# Supplementary material for: In Vitro-Generated Hypertrophic-Like Adipocytes Displaying PPARG Isoforms Unbalance Recapitulate Adipocyte Dysfunctions In Vivo
Source: PubMed Central journal article supplement (PMC7290899; doi:10.3390/cells9051284), 2020-05-21
Supplement: cells-09-01284-s001.pdf [file cells-09-01284-s001.pdf]

Figure S1

A

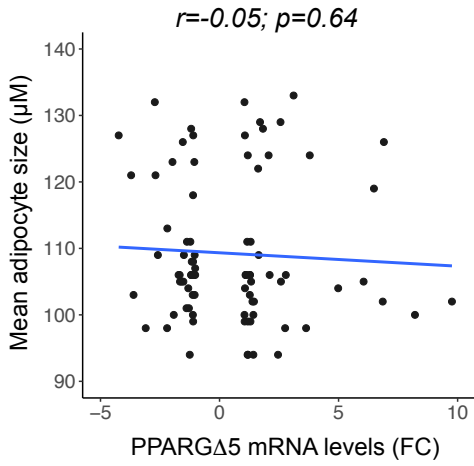

B

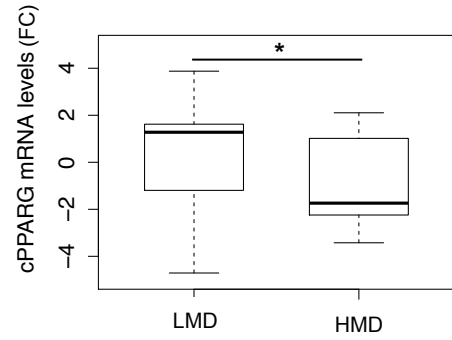

C

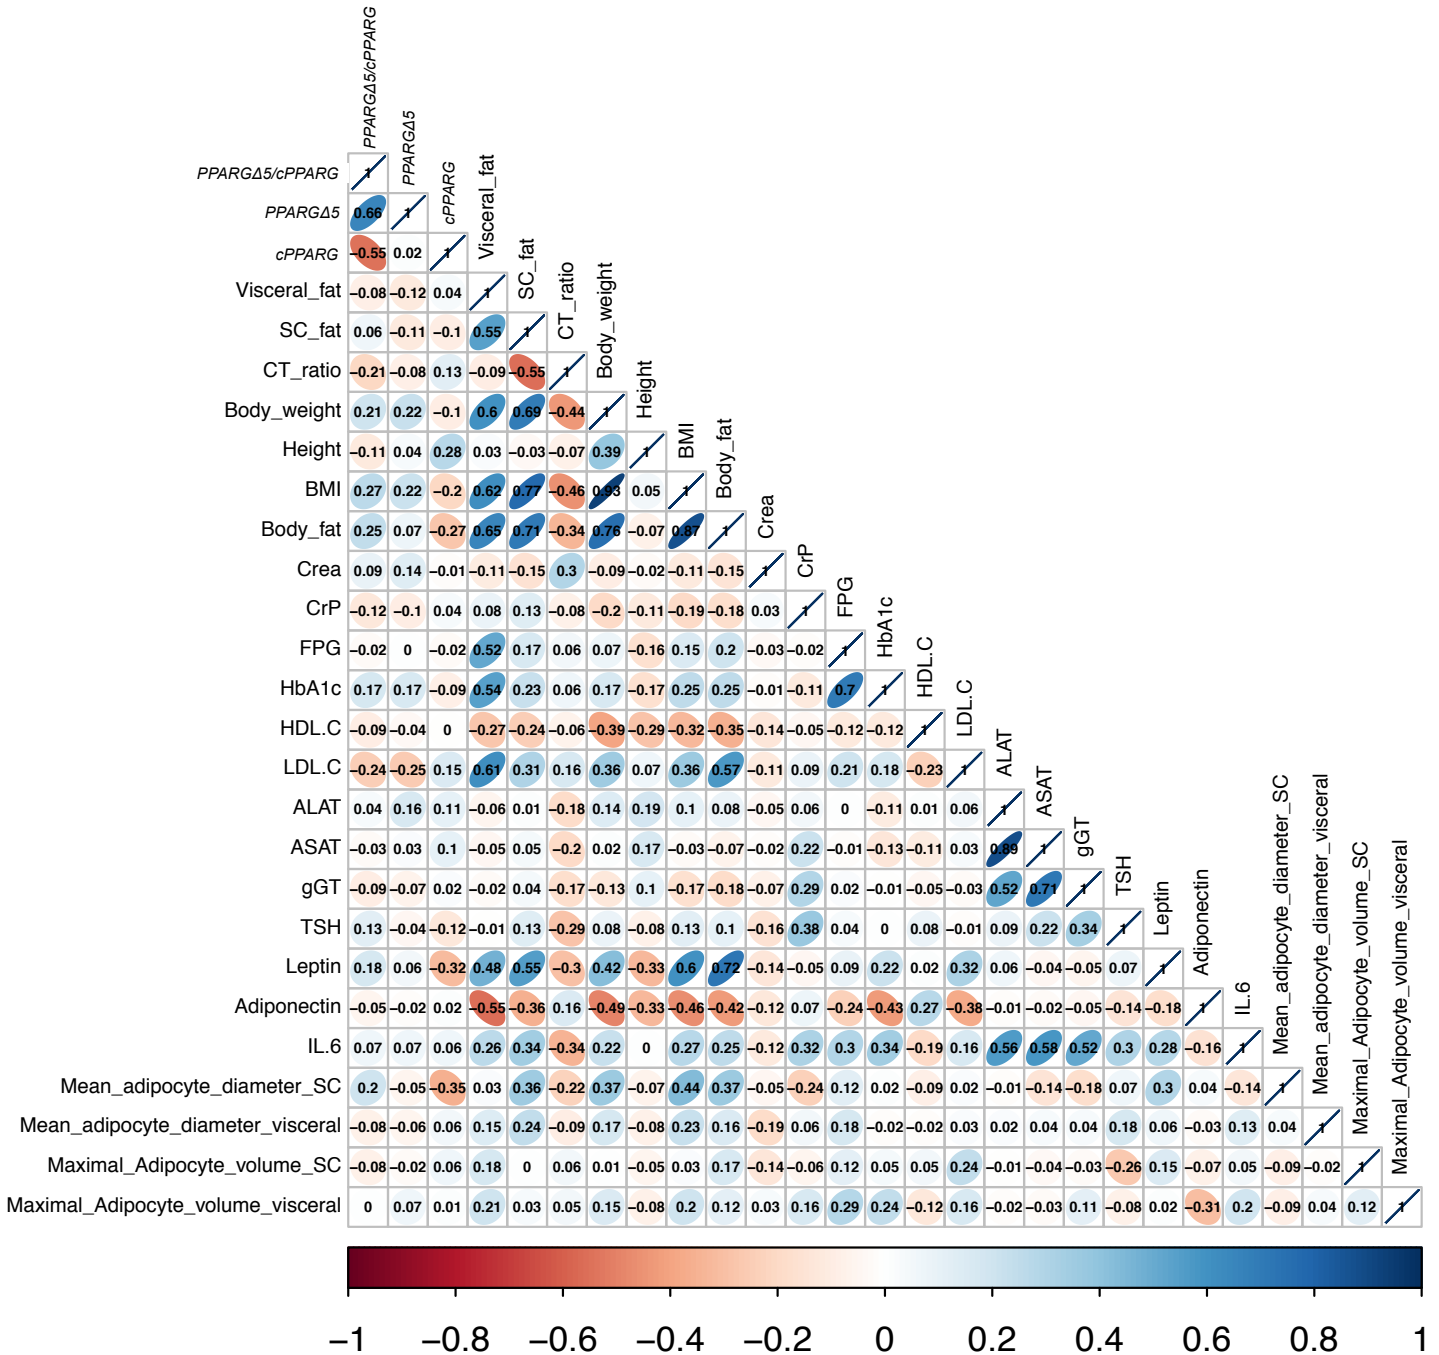

### Figure S1. Correlation of PPARG $\Delta$ 5 and cPPARG levels with clinical and biochemical parameters

(A) Scatterplot resulting from regression analysis and showing correlation between PPARG $\Delta$ 5 levels and mean diameter of subcutaneous adipocyte size (N=86). Pearson correlation coefficient (r) and p value (p) are shown.

(B) Boxplot showing cPPARG levels in two subgroups, defined according to the mean diameter of subcutaneous adipocytes as “Low Mean Diameter” (LMD; mean diameter <115 $\mu$ m, N=63) and “High Mean Diameter” (HMD; mean diameter >115 $\mu$ m, N=23) group. \*p<0.05.

(C) Corrplot reporting the Pearson’s correlation coefficients for cPPARG, PPARG $\Delta$ 5, PPARG $\Delta$ 5/cPPARG and several clinical and biochemical parameters. CT\_ratio=VAT/SAT ratio by computed tomography, CREA=Creatinine, CRP=C-reactive protein, FPG=fasting plasma glucose, HbA1c=Hemoglobin A1c, HDL.C=High-Density Lipoprotein-Cholesterol, LDL.C=Low-Density Lipoprotein-Cholesterol, ALAT=Alanine aminotransferase, ASAT=Aspartate transaminase, gGT=gamma-glutamyl transpeptidase, SC=subcutaneous.

### Figure S2

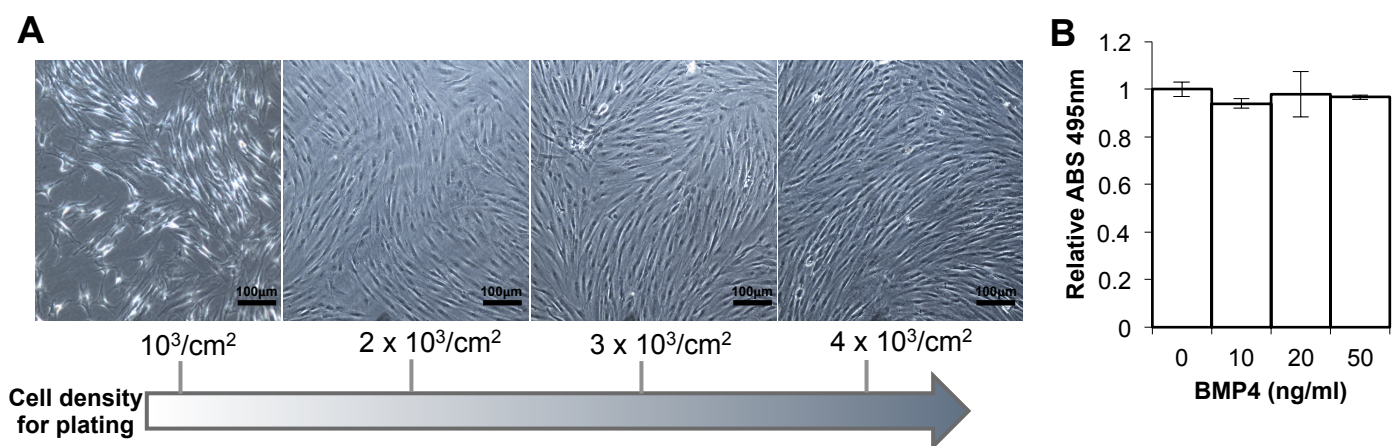

### Figure S2. Adipocyte differentiation of hMSCs is affected by densities of cell plating

(A) Representative phase-contrast images of hMSCs plated at different densities ( $10^3$ ,  $2 \times 10^3$ ,  $3 \times 10^3$  and  $4 \times 10^3/\text{cm}^2$ ; scale bars, 100  $\mu\text{m}$ ).

(B) Lipid accumulation by oil Red O staining (optical density) of mature adipocytes differentiated from hMSCs with adipogenic mixes supplemented with increasing doses (i.e. 10, 20 and 50 ng/mL) of Bone Morphogenic Protein 4 (BMP4). Data are reported as mean  $\pm$ SEM vs cells treated with vehicle (0 ng/mL).

**Figure S3**

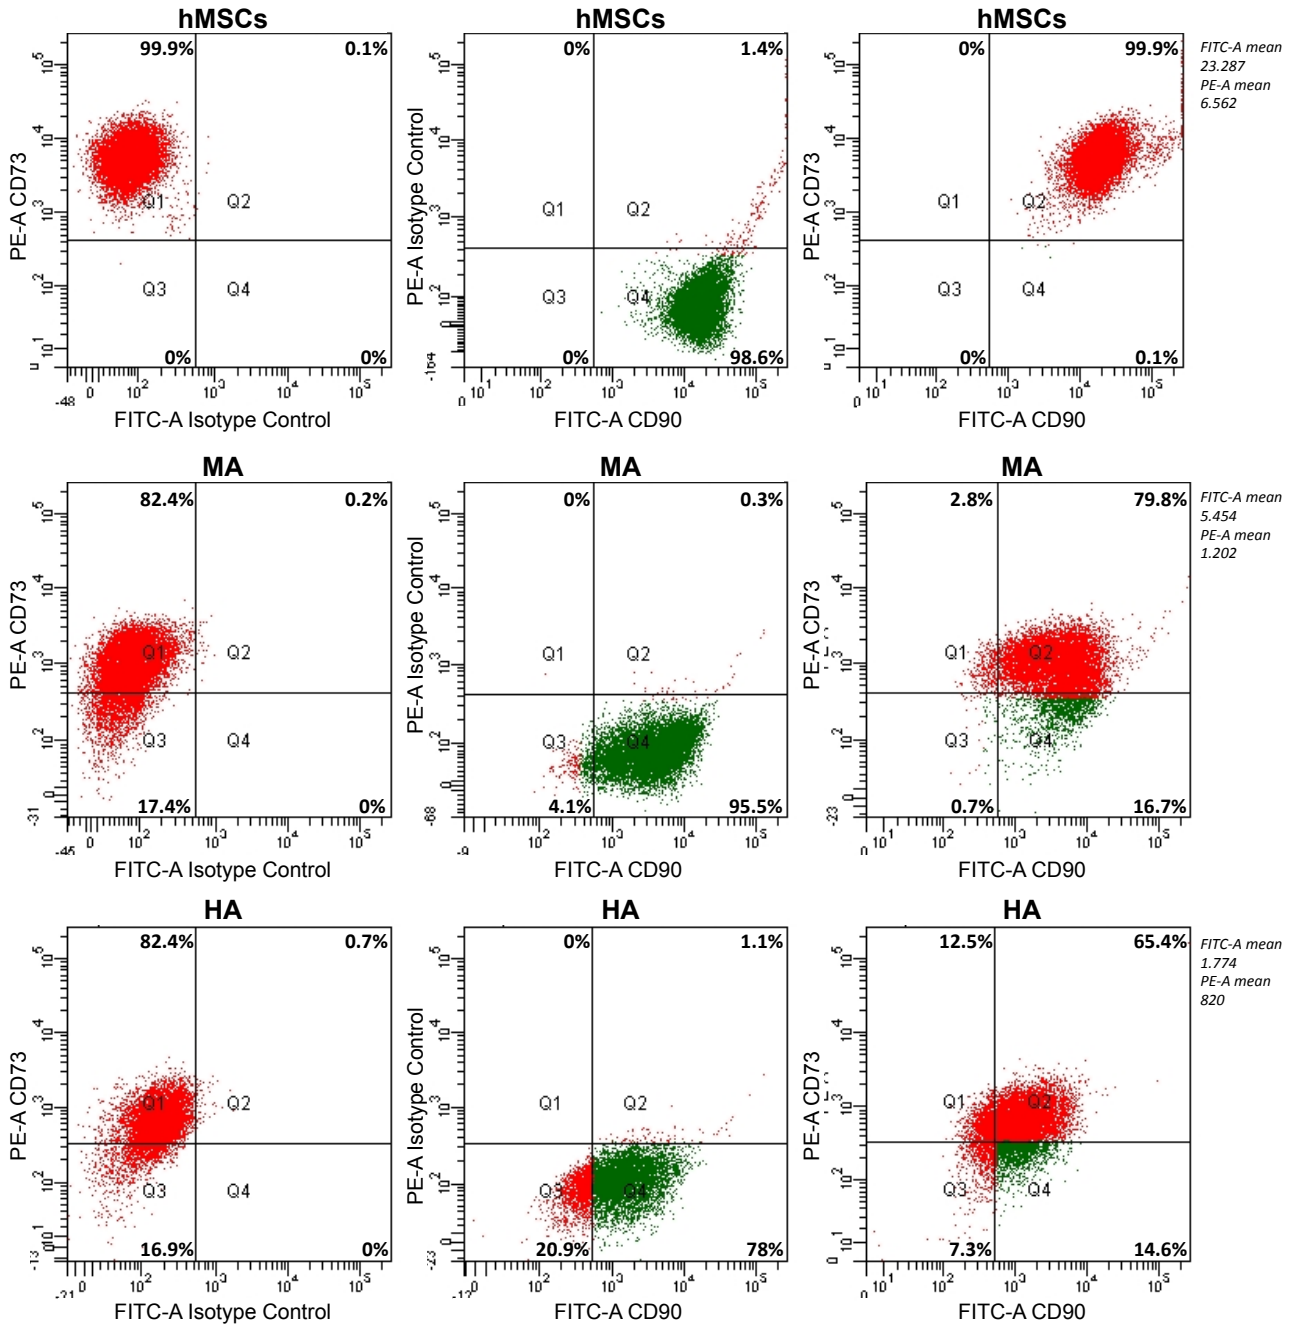

**Figure S3. Stemness markers expression in terminally differentiated hMSCs and in hypertrophic-like cells**

Flow cytometry analysis of CD73 and CD90 markers in hMSCs at starting point (hMSCs), in mature (MA) and hypertrophic-like adipocytes (HA). PE and FITC fluorophores were conjugated to anti-CD73 and anti-CD90 antibodies, respectively. Left boxes show expression values of FITC- and PE-isotype controls.

**Figure S4**

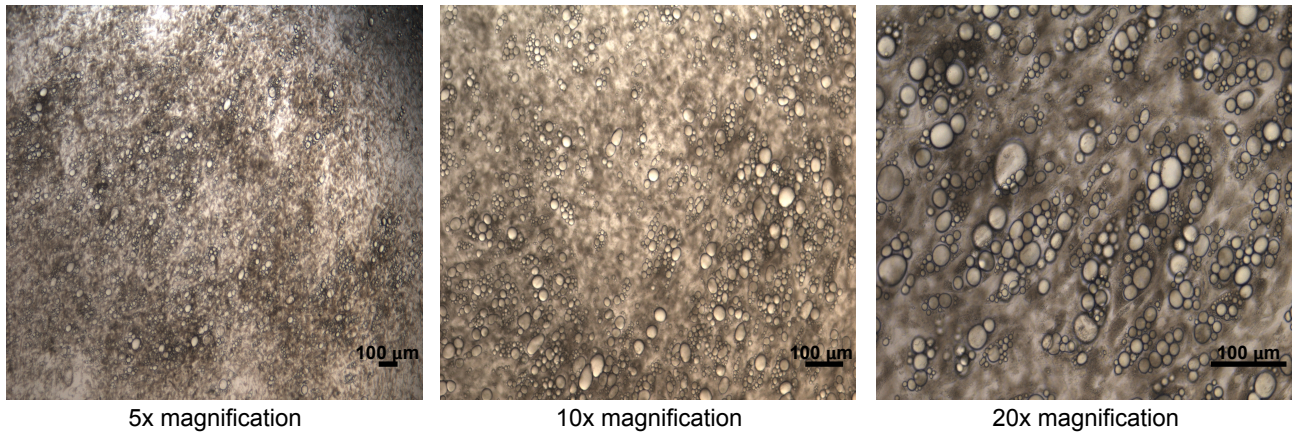

**Figure S4. Hypertrophic-like adipocytes are less prone to dedifferentiation *in vitro***  
Representative phase-contrast images at different magnifications cultured of hypertrophic-like adipocytes in standard conditions for additional 30 days (scale bars, 100 μm).



**Figure S5**

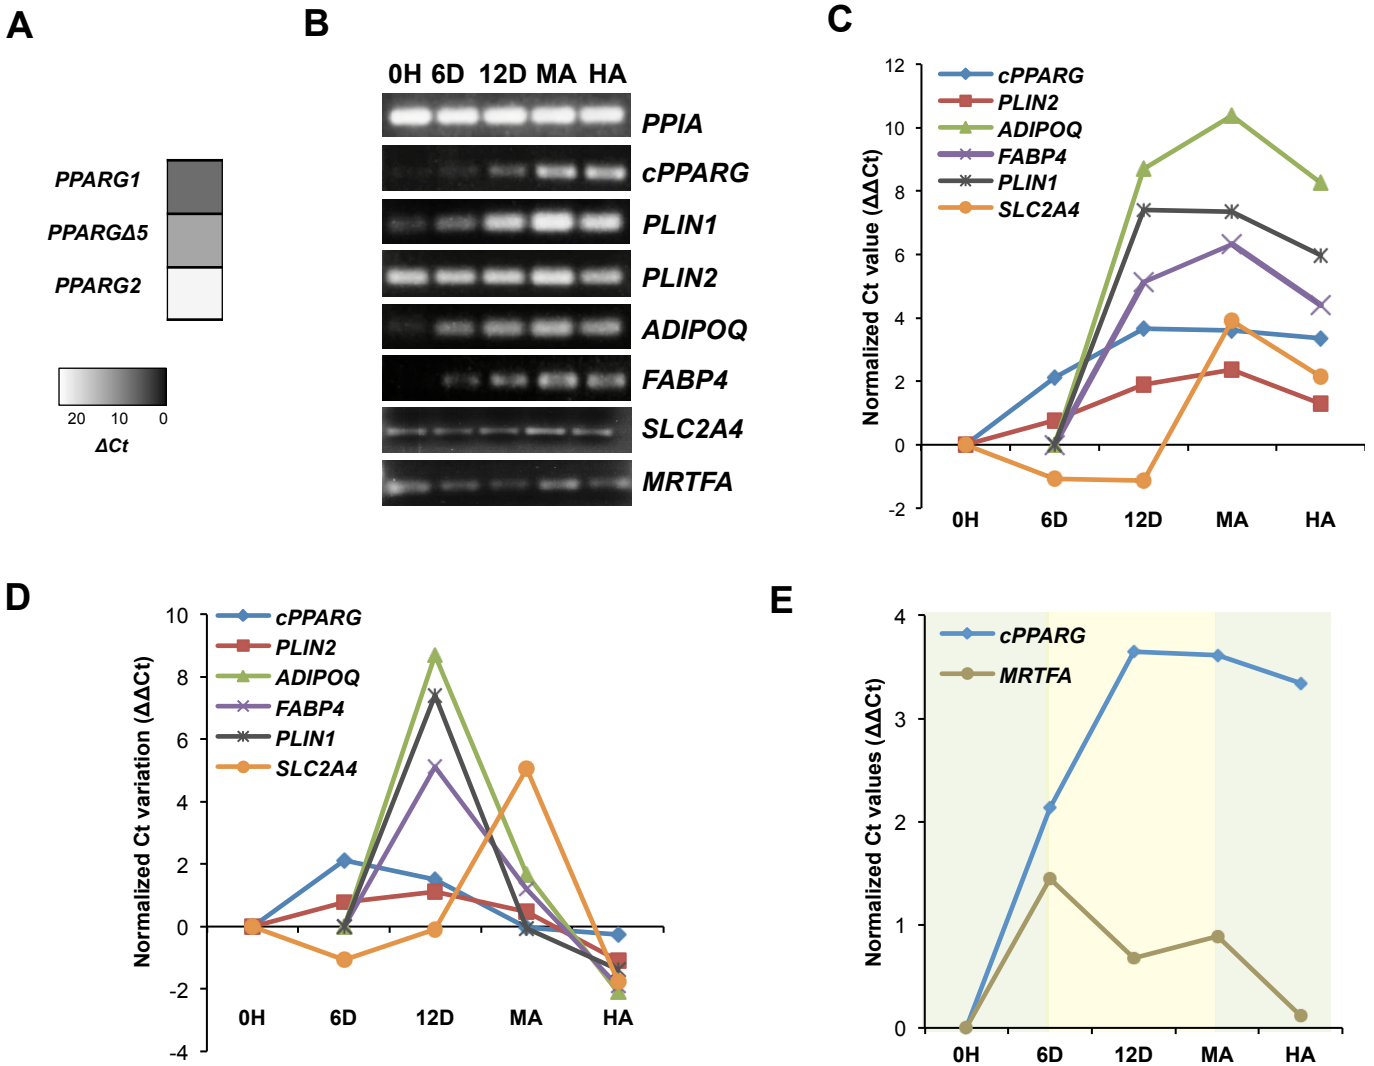

**Figure S5. Expression trends of PPAR $\gamma$  and its target genes**

**(A)** Gray-scale heatmap of normalized mRNA expression values (i.e.  $\Delta Ct = Ct \text{ gene} - Ct \text{ PPIA}$ ) of canonical (PPARG1 and PPARG2) and dominant negative (PPARG $\Delta 5$ ) PPARG transcripts determined by qPCR in hMSCs (T=0 hours). PPIA was used as reference gene.

**(B)** Representative gel images of RT-PCR assays in hMSCs at different time points upon adipogenic induction (T=0 hours, T=6 and T=12 days) and in mature and hypertrophic-like adipocytes (MAs and HAs, respectively).

**(C)** Line charts displaying gene expression trends (normalized mRNA expression values;  $\Delta\Delta Ct = \Delta Ct \text{ sample} - \Delta Ct \text{ reference sample}$ ) measured by qPCR. PPIA was used as reference gene for all analyzed genes. For each gene, the first time point showing detectable mRNA levels was used as reference ( $\Delta\Delta Ct = 0$ ). Data are reported as mean from three independent experiments.

**(D)** Line charts showing gene expression variations between two subsequent time points ( $\Delta\Delta Ct \text{ time point 2} - \Delta\Delta Ct \text{ time point 1}$ ) along hMSCs differentiation determined by qPCR. PPIA was used as reference gene and data are reported as mean from three independent experiments.

**(E)** Line charts comparing gene expression trends - analyzed as in panel C - of cPPARG and MRTFA genes along hMSCs differentiation. Similar expression trends at specific time points are indicated by light green boxes (from T=0 hours to T=6 days, from MA to HA) and opposite trends in stages indicated by yellow box (from T=6 days to MA).

Figure S6

A

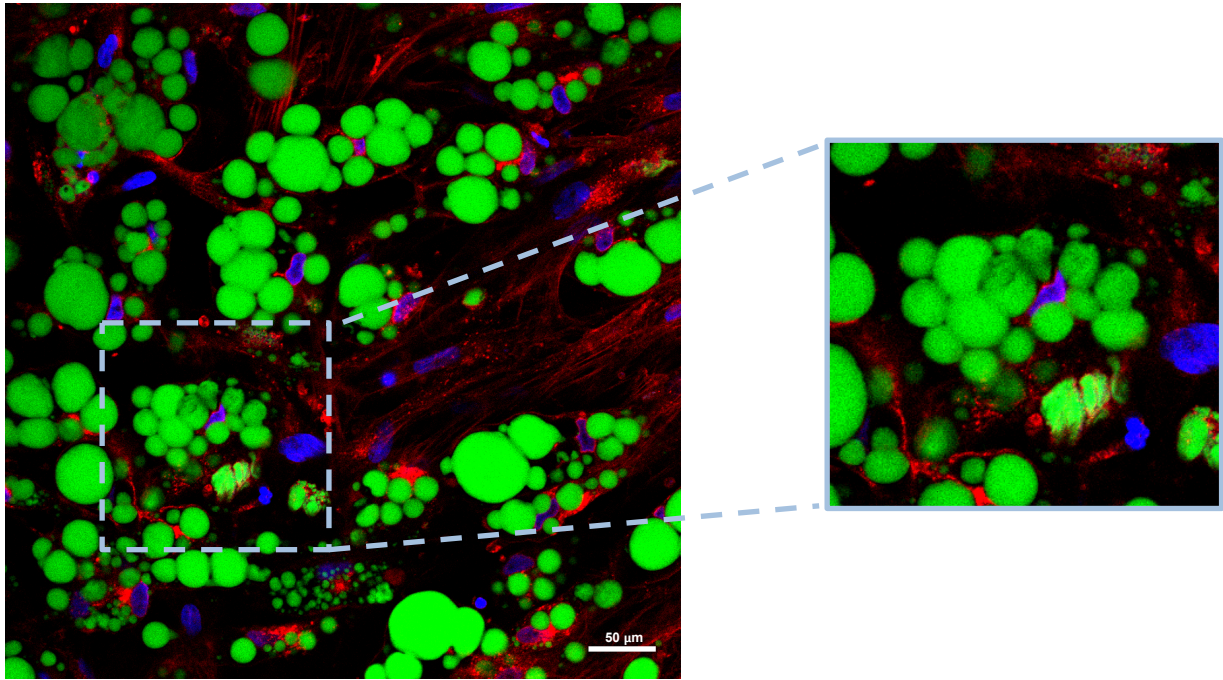

B

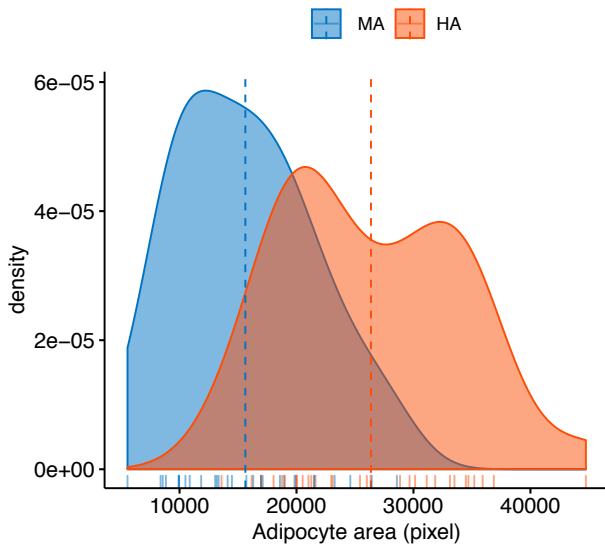

C

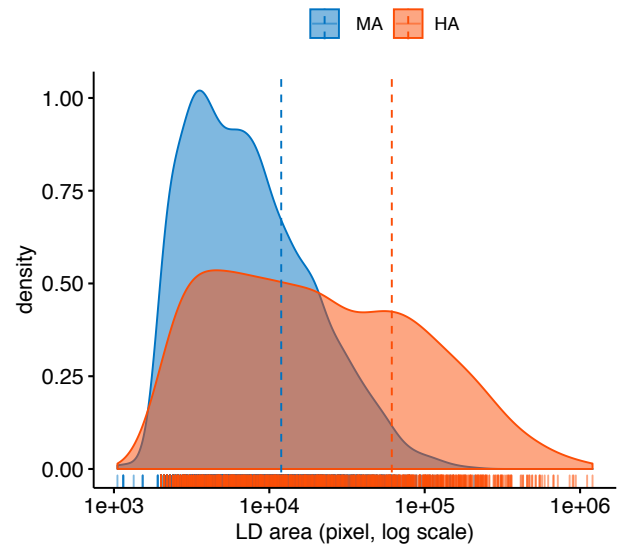

**Figure S6. Morphometric characteristics of hypertrophic-like adipocytes**

(A) Representative confocal microscopy images displaying a marked *nuclei* pressure in hypertrophic-like adipocytes stained with DAPI (*nuclei*, blue), Bodipy 495/503 (lipid droplets, green) and WGA 632/647 (cell membranes, red; scale bar, 50  $\mu$ m).

(B-C) Density plots showing value distribution of (B) adipocyte area - analyzed on MAs (n=30) and HAs (n=30) - and (C) lipid droplets area measured on 2973 LDs (from 214 MAs) and on 1168 LDs (from 206 HAs).

**Figure S7**

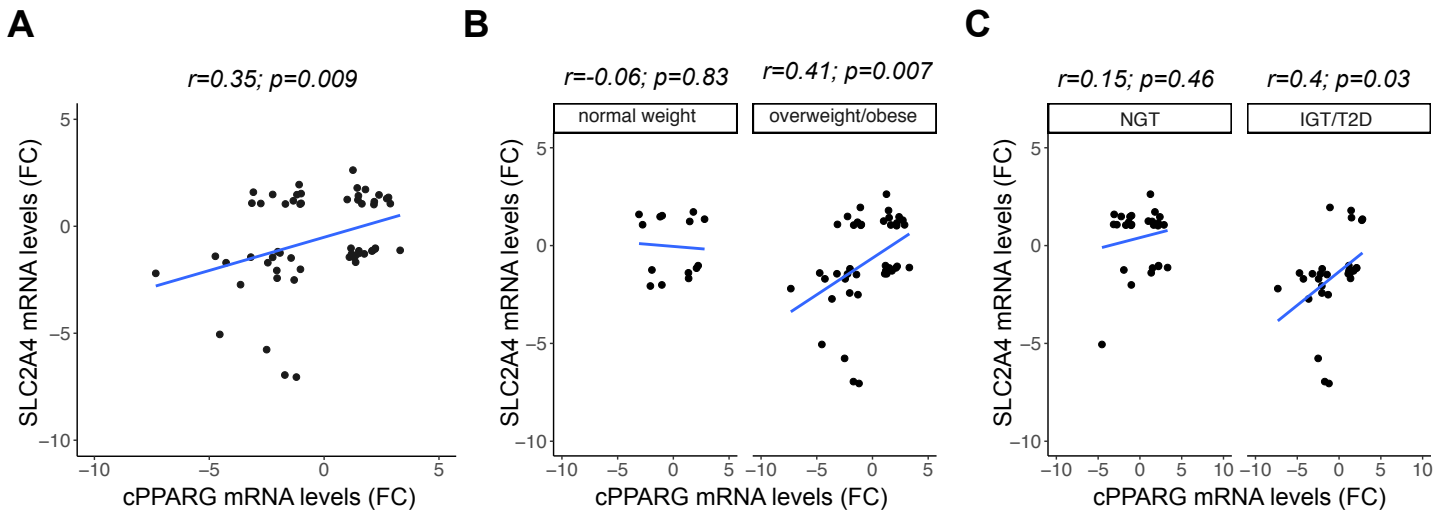

**Figure S7. The expression of canonical *PPARG* transcripts correlates with *SLC2A4* levels**

cPPARG expression was previously measured in Aprile et al., 2018.

(A-C) Scatterplot reporting the correlation by linear regression analysis between *SLC2A4* and cPPARG expression levels (qPCR) in the SAT of a subset of individuals (N=56); stratified in subgroups according to BMI in normal weight (N=14) and overweight/obese (N=42), or to glucose-metabolizing capacity in NGT (N=27), IGT and T2D (N=29). *RPS23* was used as reference gene. Pearson's correlation coefficient ( $r$ ) and  $p$  values ( $p$ ) are shown.

**Table S1. Sequences of oligonucleotides used in RT-PCR and qPCR assays**

| Gene           | Sense Primer (5'-3')   | Antisense Primer (5'-3') | Melting Temperature (°C) | PCR product (bp) | Reference figure                                   |
|----------------|------------------------|--------------------------|--------------------------|------------------|----------------------------------------------------|
| <i>cPPARG</i>  | GAGAAGGAGAAGCTGTTGCC   | ATGGCCACCTCTTTGCTCT      | 60                       | 272              | 1B-C-D; 3C; 4A-B; 6F-G; 7A-B-C; S5B-C-D-E; S7A-B-C |
| <i>ADIPOQ</i>  | CTGGTGAGAAGGGTGAGAAA   | GTTCTCCTTTCCTGCCTTGG     | 60                       | 126              | 3C; 4A-B; 6G; S5B-C-D                              |
| <i>FABP4</i>   | TGTGTGATGCTTTTGTAGGTAC | CTTCGTCAAATTCCTGGCCC     | 60                       | 215              | 3C; 4A-B; 6G; S5B-C-D                              |
| <i>LPL</i>     | CGCCGCCGACCAAAGAAGA    | AGGTAGCCACGGACTCTGC      | 60                       | 122              | 4A-B; 6G                                           |
| <i>PPARGΔ5</i> | CTTGCACTGGGGATGTCTCA   | CAGCAAACCTGGGCGGTGA      | 60                       | 242              | 1A-C-D; 6F-G; S5A                                  |
| <i>PPIA</i>    | TACGGGTCCTGGCATCTTGT   | GGTGATCTTCTTGCTGGTCT     | 60                       | 196              | 3C; 4A-B; 6F-G; S5A-B-C-D-E                        |
| <i>MRTFA</i>   | TTGAAACTCCAGCAGCGCC    | GCTCCTTCTCTGCTCATGA      | 60                       | 99               | 4A-B; 6G; S5B-E                                    |
| <i>SLC2A4</i>  | CGTCGGGCTTCCAACAGAT    | GAGCCAAGCACCGCAGAGA      | 60                       | 100              | 3C; 4A-B; 6G; 7A-B-C; S5B-C-D; S7A-B-C             |
| <i>PLIN1</i>   | GCCTCACCTTGCTGGATGG    | GTGGGCTTCCTTAGTGCTG      | 60                       | 128              | 3C; 4A-B; 6G; S5B-C-D                              |
| <i>PLIN2</i>   | GGGCTAGACAGGATTGAGGA   | TCACTGCCCTTTGGTCTTG      | 60                       | 181              | 3C; 4A-B; 6G; S5B-C-D                              |
| <i>IRS2</i>    | TACATCGCCATCGACGTGAG   | TCAATGCTGGCGTAGGTGTT     | 60                       | 215              | 3C; 4A-B; 6G                                       |
| <i>RPS23</i>   | TCGTGGACTTCGTA CTGCT   | GCTGTGATTTTCTTGCCATTC    | 60                       | 237              | 1A-B-C-D; 7A-B-C; S7A-B-C                          |
| <i>PPARG1</i>  | CGAGGACACCGGAGAGGG     | TGTGTCAACCATGGTCATTTTC   | 60                       | 135              | S5A                                                |
| <i>PPARG2</i>  | TCCATGCTGTTATGGGTGAA   | TGTGTCAACCATGGTCATTTTC   | 60                       | 113              | S5A                                                |



**Table S2. Reagents and resources information**

| REAGENT                                                                | SOURCE                                                                    | IDENTIFIER                                                                            |
|------------------------------------------------------------------------|---------------------------------------------------------------------------|---------------------------------------------------------------------------------------|
| <b>Antibodies</b>                                                      |                                                                           |                                                                                       |
| PPAR $\gamma$ (C26H12) Rabbit mAb (N terminus)                         | Cell Signaling Technology                                                 | Cat# 2435                                                                             |
| GLUT-4 Polyclonal Antibody                                             | Elabscience                                                               | Cat#E-AB-30268                                                                        |
| ADIPOQ Polyclonal Antibody                                             | Elabscience                                                               | Cat#E-AB-40301                                                                        |
| FABP4 Polyclonal Antibody                                              | Elabscience                                                               | Cat#E-AB-60028                                                                        |
| IRS2 Polyclonal Antibody                                               | Elabscience                                                               | Cat#E-AB-62281                                                                        |
| HSP90AA1 Mouse Monoclonal Antibody                                     | Origene                                                                   | Cat# TA500883                                                                         |
| Goat Anti-Mouse IgG (H L)-HRP Conjugate                                | Bio-Rad                                                                   | Cat# 170-6516                                                                         |
| Goat Anti-Rabbit IgG (H L)-HRP Conjugate                               | Bio-Rad                                                                   | Cat# 170-6515                                                                         |
| <b>Biological Samples</b>                                              |                                                                           |                                                                                       |
| Subcutaneous adipose tissue cDNA samples of a Geman cohort of patients | Prof. Matthias Blüher.<br>(Keller et al., 2016; Guiu-Jurado et al., 2016) | N/A                                                                                   |
| <b>Chemicals, Peptides, and Recombinant Proteins</b>                   |                                                                           |                                                                                       |
| DMEM/F-12, no glutamine                                                | Thermo Fisher Scientific                                                  | Cat# 21331020                                                                         |
| Fetal Bovine Serum Origin: EU Approved (South American)                | Thermo Fisher Scientific                                                  | Cat# 10270106                                                                         |
| Fetal Bovine Serum, qualified, Australia                               | Thermo Fisher Scientific                                                  | Cat# 10099141                                                                         |
| Penicillin-Streptomycin (5,000 U/mL)                                   | Thermo Fisher Scientific                                                  | Cat# 15070063                                                                         |
| L-Glutamine (200 mM)                                                   | Thermo Fisher Scientific                                                  | Cat# 25030081                                                                         |
| BMP4 Recombinant Human Protein                                         | Thermo Fisher Scientific                                                  | Cat# PHC9534                                                                          |
| Troglitazone                                                           | Sigma Aldrich                                                             | Cat# T2573                                                                            |
| Rosiglitazone                                                          | Sigma Aldrich                                                             | Cat# R2408                                                                            |
| Cycloheximide                                                          | Sigma Aldrich                                                             | Cat# 01810                                                                            |
| GW9662                                                                 | Sigma Aldrich                                                             | Cat# M6191                                                                            |
| Insulin (Humulin R)                                                    | Lilly                                                                     | Cat# AIC025707011/M                                                                   |
| Dexamethasone                                                          | Sigma Aldrich                                                             | Cat# D4902                                                                            |
| Isobutyl-1-methylXanthine                                              | Sigma Aldrich                                                             | Cat# I7018                                                                            |
| Biotin                                                                 | Sigma Aldrich                                                             | Cat# B4639                                                                            |
| D- Pantothenic acid hemicalcium                                        | Sigma Aldrich                                                             | Cat# P5155                                                                            |
| Pierce IP Lysis buffer                                                 | Thermo Fisher Scientific                                                  | Cat# 87787                                                                            |
| Halt Protease                                                          | Thermo Fisher Scientific                                                  | Cat# 78429                                                                            |
| Phosphatase Inhibitor Cocktail                                         | Thermo Fisher Scientific                                                  | Cat# 78420                                                                            |
| Oil red O staining                                                     | Sigma Aldrich                                                             | Cat# O1391                                                                            |
| Bodipy 493/503                                                         | Thermo Fisher Scientific                                                  | Cat# D3922                                                                            |
| DAPI (4',6-Diamidino-2-Phenylindole, Dihydrochloride)                  | Thermo Fisher Scientific                                                  | Cat# D1306                                                                            |
| Wheat Germ Agglutinin, Alexa Fluor™ 633 Conjugate                      | Thermo Fisher Scientific                                                  | Cat# W21404                                                                           |
| Quick Start™ Bradford 1x Dye Reagent                                   | Bio- Rad                                                                  | Cat# 5000205                                                                          |
| Pierce™ ECL Western Blotting Substrate                                 | Thermo Fisher Scientific                                                  | Cat# 32209                                                                            |
| <b>Commercial Assays</b>                                               |                                                                           |                                                                                       |
| High Capacity cDNA Reverse Transcription kit                           | Thermo Fisher Scientific                                                  | Cat# 4368814                                                                          |
| <b>Experimental Models: Cell Lines</b>                                 |                                                                           |                                                                                       |
| hTERT immortalized Adipose Derived Mesenchymal Stem Cells              | ATCC                                                                      | Cat# SCRC4000                                                                         |
| <b>Software and Algorithms</b>                                         |                                                                           |                                                                                       |
| R Bioconductor package                                                 | Tarazona et al., 2011                                                     | <a href="https://www.bioconductor.org/">https://www.bioconductor.org/</a>             |
| FACSDiva software                                                      |                                                                           | <a href="https://www.bdbiosciences.com">https://www.bdbiosciences.com</a>             |
| GelQuant.NET software                                                  |                                                                           | <a href="https://www.biochemlabsolutions.com">https://www.biochemlabsolutions.com</a> |
| ImageJ                                                                 | Abramoff et al., 2004                                                     | <a href="https://imagej.net/Citing">https://imagej.net/Citing</a>                     |
